# Supplementary material
Source: publisher site journal article supplement (https://www.dovepress.com/article/344318)
Supplement: Supplementary file 1 [file get_supplementary_file.php]

Supporting Information

**Endogenous N-oleoylethanolamine Crystals loaded Lipid Nanoparticles with Enhanced Hydrophobic Drug Loading Capacity for Efficient Stroke Therapy**

Shichao Wu#, Di Liao#, Xi Li, Zeyu Liu, Lin Zhang, Fanny Mo, Shuo Hu*, Jian Xia*, Xiangrui Yang*





Figure S1. The size distribution of OSDP LNPs.





Figure S2. The drug release,drug loading and entrapment efficiency of OEA, OEA-SPC LNPs, and OSDP LNPs.

Figure S3. The Zeta potential of OSDP LNPs.


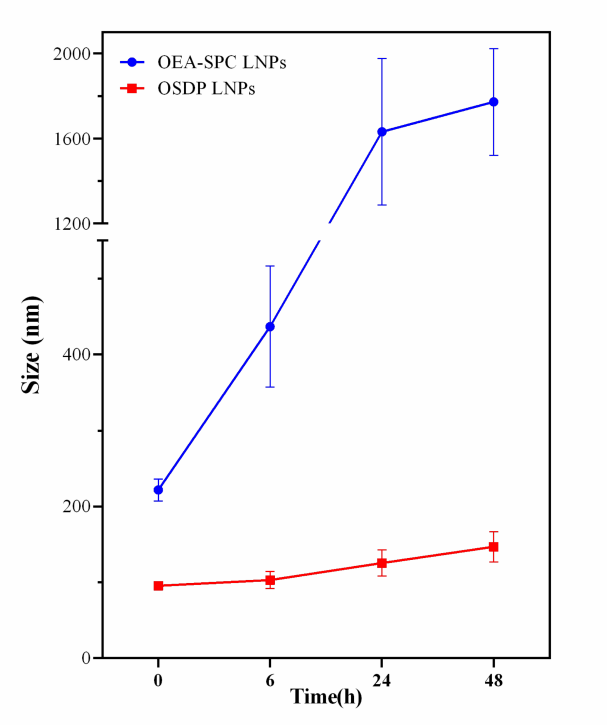


Figure S4. The size changes of OSDP LNPs and OEA-SPC LNPs in PBS (pH 7.4, 0.1 M, 37 °C).


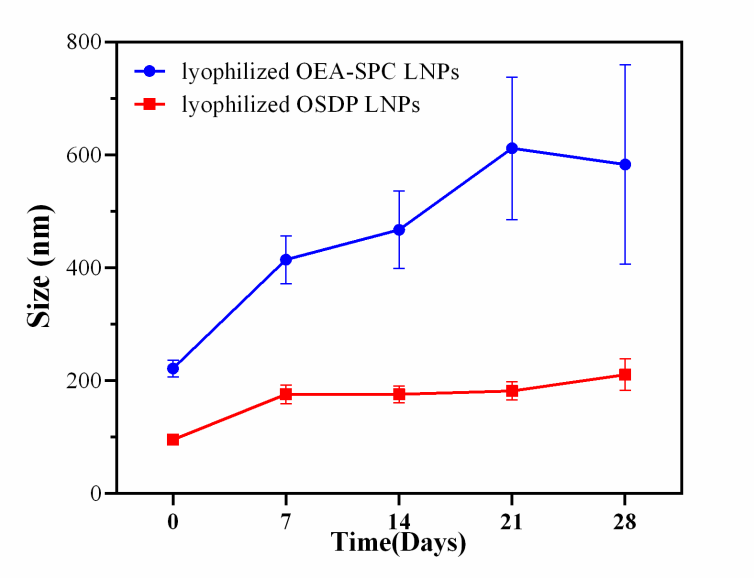


Figure S5. The size changes of redissolved dispersion of lyophilized OSDP LNPs and OEA-SPC LNPs in 1 month.


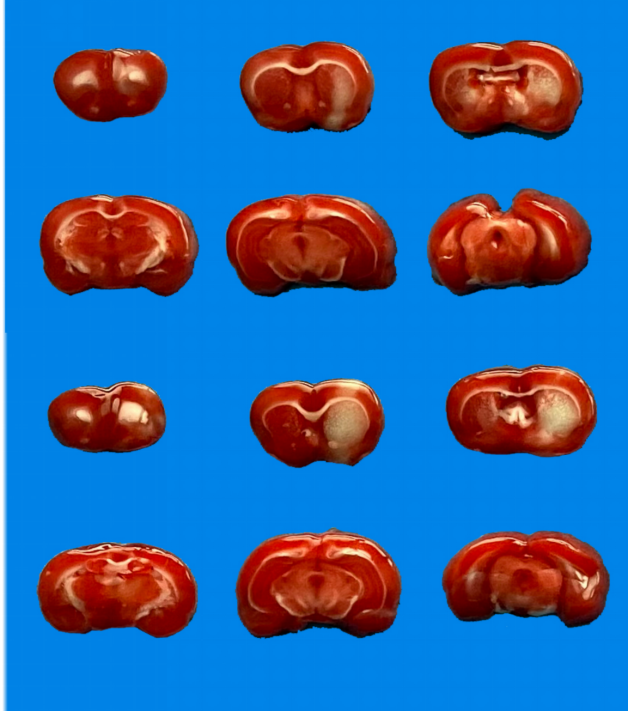


Figure S6. The TTC-stained brain slices from the dead rats of the OSDP LNPs group.
